# Supplementary material for: Used Nasogastric Feeding Tubes from Neonates Contain Infant-Specific Bacterial Profiles
Source: MDPI journal article supplement (doi:10.3390/microorganisms11061365), 2023-05-23
Supplement: s1 [file s1]

**Supplementary Table S1.** Clinical data of the infants (n = 34) and data regarding nasogastric feeding tubes (n = 94)

| <b>Metadata at birth</b>                                                                                |                       |
|---------------------------------------------------------------------------------------------------------|-----------------------|
| Birth weight (g), median (IQR)                                                                          | 1083 (1259)           |
| Gestational age (wks), median (IQR)                                                                     | 30.1 (7.6)            |
| Male sex                                                                                                | 20 (58.8%)            |
| Cesarian section                                                                                        | 22 (64.7%)            |
| Multiple birth (mother)                                                                                 | 14 (41.2%)            |
| <b>While the tube was in place</b>                                                                      |                       |
| Postnatal age (d), median (IQR)                                                                         | 37 (39)               |
| Unpasteurized maternal milk feeding                                                                     | 85 (90.4%)            |
| Probiotics ( <i>Lactobacillus rhamnosus</i> GG and <i>Bifidobacterium animalis</i> ssp. <i>lactis</i> ) | 72 (76.6%)            |
| Antibiotics                                                                                             | 42 (44.7%)            |
| Proton pump inhibitor                                                                                   | 1 (1.1%)              |
| Ventilation                                                                                             |                       |
| Mechanical                                                                                              | 8 (8.5%)              |
| Nasal c-pap                                                                                             | 57 (60.6%)            |
| Oxygen mask                                                                                             | 3 (3.2%)              |
| None                                                                                                    | 26 (27.7%)            |
| Parenteral nutrition                                                                                    | 21 (22.3%)            |
| <b>Major outcomes</b>                                                                                   |                       |
| Sepsis (Positive blood culture and clinical signs of sepsis)                                            | 5 (14.7%)             |
| Necrotizing enterocolitis (Bells modified stage II or III)                                              | 6 (17.6%)             |
| Deceased                                                                                                | 4 (11.8%)             |
| <b>Number of tubes per infant</b>                                                                       |                       |
| Number of tubes                                                                                         | Number of infants (%) |
| 1                                                                                                       | 14 (41.2%)            |
| 2                                                                                                       | 8 (23.5%)             |
| 3                                                                                                       | 2 (5.9%)              |
| 4                                                                                                       | 3 (8.8%)              |
| 5                                                                                                       | 2 (5.9%)              |
| 6                                                                                                       | 1 (2.9%)              |
| 7                                                                                                       | 3 (8.8%)              |
| 9                                                                                                       | 1 (2.9%)              |

**Supplementary Table S2.** Table listing bacterial colonies identified with WGS across NG-tubes collected from eight preterm infants

|                                   | Child A      | Child B      | Child C      | Child D      | Child E      | Child F      | Child G      | Child H      |
|-----------------------------------|--------------|--------------|--------------|--------------|--------------|--------------|--------------|--------------|
| <i>Klebsiella oxytoca</i>         | 6/7 NG-tubes | 6/7 NG-tubes | -            | -            | -            | -            | -            | -            |
| <i>Enterobacter cloacae</i>       | -            | -            | 2/4 NG-tubes | 7/9 NG-tubes | 7/7 NG-tubes | -            | -            | -            |
| <i>Enterococcus faecium</i>       | -            | -            | 3/4 NG-tubes | -            | -            | -            | 3/4 NG-tubes | 5/5 NG-tubes |
| <i>Staphylococcus epidermidis</i> | -            | -            | -            | -            | -            | 4/6 NG-tubes | 4/4 NG-tubes | -            |
